# Supplementary material
Source: publisher figshare collection journal article supplement (https://acs.figshare.com/ndownloader/files/4521922)
Supplement: Supplementary file 1 [file 4521922]

### Supplemental Table S2

Multivariate linear regression analysis for the serum RbAp46 level in lung cancer and non-cancer patients

| Variable    |     | Regression coefficient | Standard error | <i>p</i> | <i>r</i> <sup>2</sup> |
|-------------|-----|------------------------|----------------|----------|-----------------------|
| Constant    |     | 23.974                 | 1.883          | <0.001   |                       |
| Smoke       | yes | -9.157                 | 2.509          | <0.001   | 0.062                 |
|             | no  | reference              |                |          |                       |
| Lung cancer | yes | 14.493                 | 2.475          | <0.001   | 0.115                 |
|             | no  | reference              |                |          |                       |

Stepwise selection method is used for analysis via the following criteria: the variable is entered for analysis if the probability is  $\leq 0.05$ , and removed if the probability is  $\geq 0.1$ . Excluded variable: gender ( $p=0.675$ )

### Supplemental Table S3

Multivariate linear regression analysis for serum levels of RbAp46 in NSCLC patients

| Variable           |     | Regression coefficient | Standard error | <i>p</i> | <i>r</i> <sup>2</sup> |
|--------------------|-----|------------------------|----------------|----------|-----------------------|
| Constant           |     | 29.350                 | 2.839          | <0.001   |                       |
| Smoke              | yes | -5.858                 | 2.941          | 0.049    | 0.033                 |
|                    | no  | reference              |                |          |                       |
| Distant metastasis | yes | 12.389                 | 2.991          | <0.001   | 0.184                 |
|                    | no  | reference              |                |          |                       |

Stepwise selection method is used for analysis by following criteria: the variable is entered for analysis if the probability is  $\leq 0.05$ , and removed if the probability is  $\geq 0.1$ . Excluded variables: gender ( $p=0.570$ ), histology ( $p=0.517$ )
